# Supplementary material
Source: publisher figshare collection journal article supplement (https://acs.figshare.com/ndownloader/files/8682796)
Supplement: Supplementary file 1 [file 8682796]

**Supporting Information**

**Thermodynamic Functions for Solubility of  
1-Hydroxybenzotriazole in Sixteen Solvents at temperatures  
from (278.15 to 313.15) K and Mixing Property of mixtures**

*Jiao Chen, Gaoquan Chen, Chao Cheng, Yang Cong, Cunbin Du, Hongkun Zhao\**

College of Chemistry & Chemical Engineering, Yangzhou University, Yangzhou, Jiangsu 225002,

People's Republic of China

**\*Corresponding author**

Tel: + 86 514 87975568; Fax: + 86 514 87975244. E-mail address: [hkzhao@yzu.edu.cn](mailto:hkzhao@yzu.edu.cn) (H.K. Zhao).

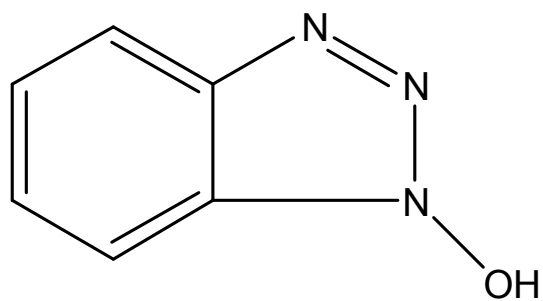

**Figure S1.** Chemical structure of 1-hydroxybenzotriazole.

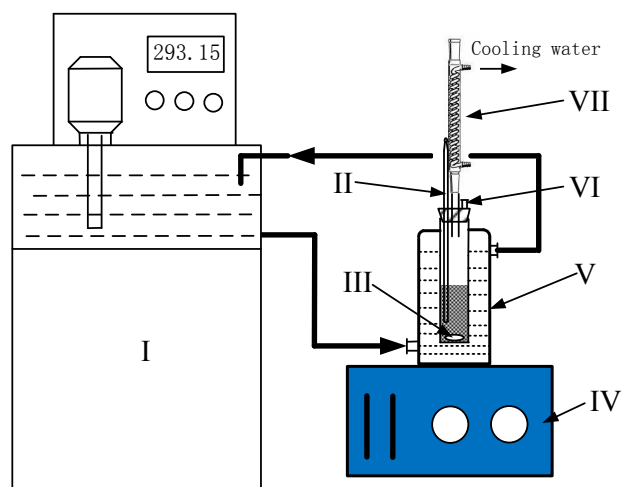

**Figure S2.** Schematic diagram of experimental apparatus: I, smart thermostatic water bath; II, mercury-in-glass thermometer; III, magnetic stirrer; IV, stirrer controller; V, jacketed glass vessel; VI, sampling port; VII, condenser.

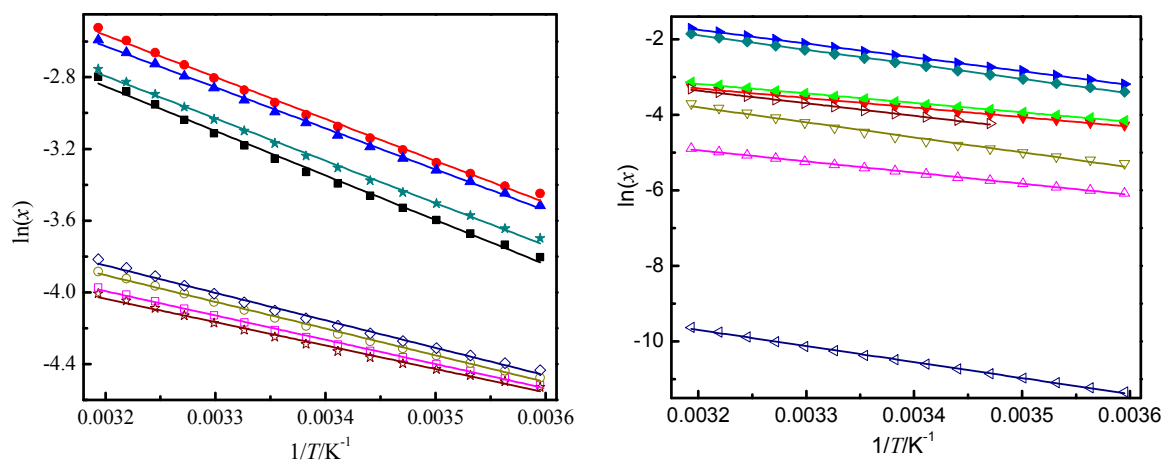

**Figure S3.** The van't Hoff plots of  $\ln(x)$  versus  $1/T$  in different solvents: ●, ethanol; ▲, *n*-propanol; ★, isopropanol; ■, methanol; ◇, *n*-heptanol; ○, *n*-hexanol; □, isoamyl alcohol; ☆, isooctyl alcohol; ▼, acetone; ◀, 1-butanone; ►, DMF; ◆, DMSO; △, acetonitrile; ▽, ethyl acetate; ◁, toluene; ▷, dioxane. —, calculated values via modified Apelblat equation.

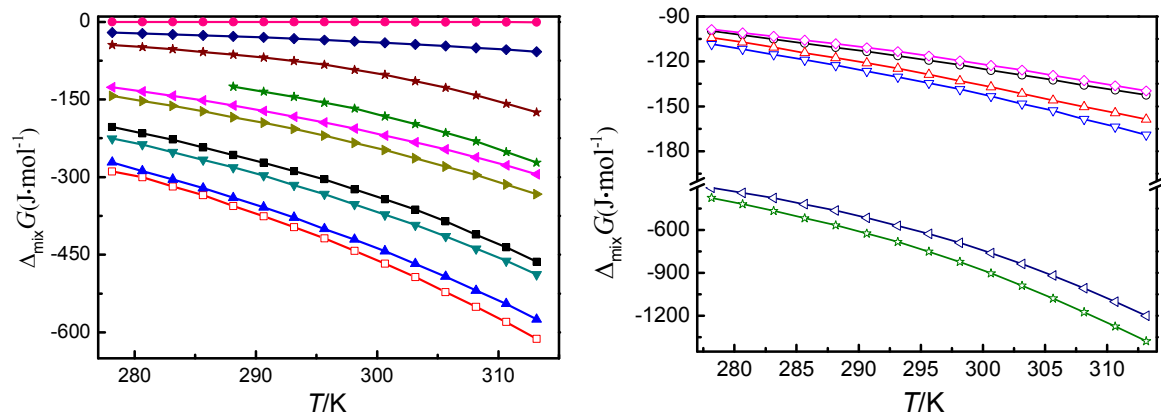

**Figure S4.** Evaluated mixing Gibbs energy at measured solubility points based on the Wilson model: ●, toluene; ◆, acetonitrile; ★, ethyl acetate; ★, 1,4-dioxane; ◀, acetone; ▶, *n*-butanol; ■, methanol; ▼, isopropanol; ▲, *n*-propanol; □, ethanol; ○, isoamyl alcohol; △, *n*-hexanol; ▽, *n*-heptanol; ◇, isooctyl alcohol; ☆, DMF; ◁, DMSO.

**Table S1** Detailed Information on the Materials Used in this Work.

| Chemicals              | Molar mass<br>$\text{g}\cdot\text{mol}^{-1}$ | Melting point<br>K                                                                                         | Melting Enthalpy<br>$\text{KJ}\cdot\text{mol}^{-1}$ | Density<br>(293 K)<br>$\text{kg}\cdot\text{m}^{-3}$ | Source                            | Initial mass fraction<br>purity | Final mass fraction<br>purity | Purification<br>method | Analytical<br>method |
|------------------------|----------------------------------------------|------------------------------------------------------------------------------------------------------------|-----------------------------------------------------|-----------------------------------------------------|-----------------------------------|---------------------------------|-------------------------------|------------------------|----------------------|
| 1-Hydroxybenzotriazole | 135.12                                       | 424.26 <sup>a</sup><br>409.15 <sup>b</sup><br>428-430 <sup>c</sup><br>433 <sup>d</sup><br>383 <sup>e</sup> | 20.05 <sup>a</sup>                                  | 1510 <sup>f</sup>                                   | Beijing HWRK<br>Chemical Co., Ltd | 0.980                           | 0.992                         | Recrystallization      | HPLC <sup>h</sup>    |
| Methanol               | 32.04                                        |                                                                                                            |                                                     | 786.5 <sup>g</sup>                                  |                                   |                                 | 0.995                         | ---                    | GC <sup>i</sup>      |
| Ethanol                | 46.07                                        |                                                                                                            |                                                     | 789.3 <sup>g</sup>                                  |                                   |                                 | 0.997                         | ---                    | GC                   |
| <i>n</i> -Propanol     | 60.10                                        |                                                                                                            |                                                     | 805.3 <sup>g</sup>                                  | Sinopharm                         |                                 | 0.995                         | ---                    | GC                   |
| Isopropanol            | 60.10                                        |                                                                                                            |                                                     | 803.5 <sup>g</sup>                                  | Chemical Reagent                  |                                 | 0.997                         | ---                    | GC                   |
| Ethyl acetate          | 88.11                                        |                                                                                                            |                                                     | 900.3 <sup>g</sup>                                  | Co., Ltd., China                  |                                 | 0.995                         | ---                    | GC                   |
| Acetonitrile           | 41.05                                        |                                                                                                            |                                                     | 776.8 <sup>g</sup>                                  |                                   |                                 | 0.993                         | ---                    | GC                   |
| Toluene                | 92.14                                        |                                                                                                            |                                                     | 871.0 <sup>g</sup>                                  |                                   |                                 | 0.995                         | ---                    | GC                   |
| 1,4-dioxane            | 88.11                                        |                                                                                                            |                                                     | 1033.7 <sup>g</sup>                                 |                                   |                                 | 0.995                         | ---                    | GC                   |
| Acetone                | 58.05                                        |                                                                                                            |                                                     | 784.5 <sup>g</sup>                                  |                                   |                                 | 0.995                         | ---                    | GC                   |
| 2-Butanone             | 72.11                                        |                                                                                                            |                                                     | 801.4 <sup>g</sup>                                  |                                   |                                 | 0.995                         | ---                    | GC                   |
| Isoamyl alcohol        | 88.15                                        |                                                                                                            |                                                     | 813.0 <sup>g</sup>                                  |                                   |                                 | 0.994                         |                        | GC                   |
| <i>n</i> -Hexanol      | 102.18                                       |                                                                                                            |                                                     | 815.3 <sup>g</sup>                                  |                                   |                                 | 0.995                         |                        | GC                   |
| <i>n</i> -Heptanol     | 116.20                                       |                                                                                                            |                                                     | 821.9 <sup>g</sup>                                  |                                   |                                 | 0.993                         |                        | GC                   |
| Isooctyl alcohol       | 130.23                                       |                                                                                                            |                                                     | 834.4 <sup>g</sup>                                  |                                   |                                 | 0.993                         |                        | GC                   |
| DMF                    | 73.09                                        |                                                                                                            |                                                     | 944.5 <sup>g</sup>                                  |                                   |                                 | 0.994                         |                        | GC                   |
| DMSO                   | 78.13                                        |                                                                                                            |                                                     | 1100 <sup>g</sup>                                   |                                   |                                 | 0.993                         |                        | GC                   |

<sup>a</sup> This work, determined at 101.1 kPa. The standard uncertainties  $u$  are  $u(T) = 0.5$  K,  $u(p) = 0.45$  kPa,  $u(\Delta_{\text{fus}}H) = 0.4$  kJ·mol<sup>-1</sup>.

<sup>b,c,d,e</sup> Taken from References 1, 2, 3 and 4, respectively.

<sup>f</sup> Calculated using Advanced Chemistry Development (ACD/Labs) Software V11.02 (© 1994-2016 ACD/Labs).

<sup>g</sup> Taken from Reference 5.

<sup>h</sup> High-performance liquid phase chromatograph.

<sup>i</sup> Gas chromatography.

**Table S2** Solubility parameters for the selected solvents.<sup>a</sup>

| Compound                                                     | methanol | ethanol     | <i>n</i> -propanol | isopropanol       | 2-butanone         | acetone             | ethyl acetate | acetonitrile |
|--------------------------------------------------------------|----------|-------------|--------------------|-------------------|--------------------|---------------------|---------------|--------------|
| Solubility parameter<br>(J·cm <sup>-3</sup> ) <sup>0.5</sup> | 29.520   | 26.577      | 24.832             | 23.322            | 19.019             | 20.054              | 18.350        | 24.087       |
| Compound                                                     | toluene  | 1,4-dioxane | isoamyl<br>alcohol | <i>n</i> -hexanol | <i>n</i> -heptanol | isooctyl<br>alcohol | DMF           | DMSO         |
| Solubility parameter<br>(J·cm <sup>-3</sup> ) <sup>0.5</sup> | 18.347   | 20.523      | 22.121             | 21.491            | 21.544             | 18.025              | 23.967        | 26.333       |

<sup>a</sup>Taken from Reference 6..

**Table S3** Parameters of the Equations and *RMSD* Values for HOBT in Different Solvents.

| Solvent            | Modified Apelblat equation |          |          |             | $\lambda h$ equation |          |             |
|--------------------|----------------------------|----------|----------|-------------|----------------------|----------|-------------|
|                    | <i>A</i>                   | <i>B</i> | <i>C</i> | $10^4 RMSD$ | $\lambda$            | <i>h</i> | $10^4 RMSD$ |
| methanol           | -219.68                    | 7437.6   | 33.61    | 1.50        | 0.3899               | 6055.4   | 7.02        |
| ethanol            | -164.79                    | 5152.1   | 25.37    | 1.61        | 0.4578               | 4837.0   | 7.06        |
| <i>n</i> -propanol | -115.83                    | 3029.8   | 18.02    | 0.96        | 0.3968               | 5390.3   | 4.25        |
| isopropanol        | -140.38                    | 4043.7   | 21.70    | 0.98        | 0.3565               | 6196.9   | 4.45        |
| 2-butanone         | -143.47                    | 4037.6   | 22.18    | 0.56        | 0.2721               | 8629.3   | 2.95        |
| acetone            | -126.92                    | 3281.2   | 19.70    | 0.46        | 0.2444               | 9681.0   | 2.22        |
| ethyl acetate      | -490.75                    | 18052.0  | 74.72    | 1.13        | 0.6750               | 5979.4   | 5.87        |
| acetonitrile       | -142.49                    | 3541.4   | 21.98    | 0.10        | 0.0693               | 40324.4  | 0.46        |
| toluene            | -24.07                     | -3369.6  | 4.396    | 0.01        | 0.0032               | 1429584  | 0.01        |
| 1,4-dioxane        | -343.62                    | 12386.2  | 52.34    | 0.94        | 0.5415               | 6072.3   | 3.82        |
| isoamylalcohol     | -78.470                    | 2122.25  | 11.78    | 0.26        | -0.0035              | 127825   | 1.86        |
| <i>n</i> -hexanol  | -88.710                    | 2461.65  | 13.39    | 0.44        | -0.0015              | 109974   | 1.87        |
| <i>n</i> -heptaol  | -152.37                    | 5236.92  | 22.94    | 0.33        | -0.0009              | 102759   | 0.85        |
| isooctyl alcohol   | -140.11                    | 4884.55  | 20.97    | 0.21        | -0.0043              | 138461   | 0.91        |
| DMF                | -57.730                    | -669.320 | 10.12    | 3.94        | 0.8229               | 4356.97  | 6.15        |
| DMSO               | -100.89                    | 1067.25  | 16.64    | 1.76        | 4357.9               | 4937.73  | 7.29        |



**Table S4** Parameters of the Wilson and NRTL Models for HOBT in Different Solvents.

| Solvent            | Wilson Model |                     |          |                     |                     | NRTL Model             |                     |          |                     |          |                     |
|--------------------|--------------|---------------------|----------|---------------------|---------------------|------------------------|---------------------|----------|---------------------|----------|---------------------|
|                    | $a_{12}$     | $b_{12} / \text{K}$ | $a_{21}$ | $b_{21} / \text{K}$ | $10^4 \text{ RMSD}$ | $a_{12}$               | $b_{12} / \text{K}$ | $a_{21}$ | $b_{21} / \text{K}$ | $\alpha$ | $10^4 \text{ RMSD}$ |
| methanol           | -0.9140      | -3.6959             | 770.68   | -122441             | 7.93                | 47.834                 | 92126.2             | 1.391    | -140.87             | 0.2      | 6.94                |
| ethanol            | -0.4832      | -121.44             | 1160.4   | -217995             | 8.24                | 2.531                  | -1393.5             | -4.508   | 2612.6              | 0.2      | 1.81                |
| <i>n</i> -propanol | -0.0017      | -174.54             | 663.25   | -109100             | 5.21                | -0.0402                | -493.79             | 2.264    | 282.11              | 0.2      | 0.85                |
| isopropanol        | 0.0055       | -120.48             | 500.91   | -81227.8            | 5.31                | 1.921                  | -1125.8             | -2.176   | 1768.4              | 0.2      | 0.98                |
| 2-butanone         | 0.2242       | -3.8527             | 39.093   | -1360.0             | 3.47                | 0.0936                 | -570.88             | 1.934    | 638.30              | 0.2      | 0.49                |
| acetone            | 0.1011       | 12.415              | 18.180   | 2880.6              | 2.66                | 2.525                  | -1202.8             | -2.942   | 1933.9              | 0.2      | 0.45                |
| ethyl acetate      | -3.659       | 1436.0              | 772.13   | 247663              | 6.74                | 3.465                  | -1578.9             | -11.780  | 5244.3              | 0.3      | 1.65                |
| acetonitrile       | 0.2612       | 377.88              | -1904.4  | 849173              | 0.52                | 0.5809                 | -626.75             | 0.5654   | 1511.2              | 0.3      | 0.09                |
| toluene            | 0.2261       | 2067.0              | 105.15   | 19959               | 0.01                | -1.803                 | -394.32             | 3.248    | 3813.5              | 0.3      | 0.007               |
| 1,4-dioxane        | -2.224       | 802.96              | 39.581   | 2668.8              | 4.07                | 3.383                  | -1743.2             | -8.833   | 4426.2              | 0.2      | 1.10                |
| isoamyl alcohol    | 5.032        | -916.30             | 1.8360   | -545.76             | 0.28                | 0.00988                | -563.71             | 5.836    | -313.95             | 0.2      | 0.28                |
| <i>n</i> -hexanol  | 4.6924       | -1064.5             | 173.35   | 2553.2              | 0.38                | 0.9304                 | -842.64             | 3.333    | 424.18              | 0.2      | 0.51                |
| <i>n</i> -heptaol  | 4.6213       | -1021.8             | 268.85   | -3647.2             | 1.90                | $9.612 \times 10^{-5}$ | -701.33             | 5.277    | 171.95              | 0.2      | 0.33                |
| isooctyl alcohol   | 5.6647       | -1257.6             | 928.84   | -0.2139             | 1.43                | 1.266                  | -1071.0             | 2.389    | 1048.0              | 0.2      | 0.25                |
| DMF                | -6.1439      | 1449.7              | 1541.4   | -290910             | 15.21               | -5.325                 | 1552.2              | 131.78   | 29285.2             | 0.47     | 15.19               |
| DMSO               | -6.5001      | 1587.7              | 621.62   | -59522.3            | 15.84               | -6.282                 | 1904.2              | 26.569   | 4697.3              | 0.47     | 6.92                |

**Table S5** Experimental Mole Fraction Solubility ( $x$ ) of HOBT in Different Solvents at the Temperature Range from  $T = (278.15 \text{ To } 313.15) \text{ K}$  under 101.1 kPa.<sup>a</sup>

| $T/\text{K}$    | 100 $x$ | 100 $RD$                         |                      |              |            |
|-----------------|---------|----------------------------------|----------------------|--------------|------------|
|                 |         | Modified<br>Apelblat<br>equation | $\lambda h$ equation | Wilson model | NRTL model |
| <i>methanol</i> |         |                                  |                      |              |            |
| 278.15          | 2.232   | -0.77                            | 2.92                 | 2.68         | 2.22       |
| 280.65          | 2.388   | -0.26                            | 1.87                 | 1.62         | 1.33       |
| 283.15          | 2.542   | -0.42                            | 0.43                 | 0.16         | 0.04       |
| 285.65          | 2.739   | 0.49                             | 0.29                 | 0.04         | 0.05       |
| 288.15          | 2.935   | 0.70                             | -0.29                | -0.53        | -0.40      |
| 290.65          | 3.138   | 0.56                             | -0.99                | -1.20        | -0.99      |
| 293.15          | 3.363   | 0.53                             | -1.35                | -1.52        | -1.25      |
| 295.65          | 3.581   | -0.28                            | -2.27                | -2.39        | -2.09      |
| 298.15          | 3.861   | 0.05                             | -1.83                | -1.88        | -1.59      |
| 300.65          | 4.152   | 0.00                             | -1.56                | -1.54        | -1.28      |
| 303.15          | 4.445   | -0.62                            | -1.67                | -1.55        | -1.36      |
| 305.65          | 4.799   | -0.49                            | -0.83                | -0.61        | -0.52      |
| 308.15          | 5.218   | 0.25                             | 0.78                 | 1.11         | 1.07       |
| 310.65          | 5.622   | -0.02                            | 1.55                 | 2.01         | 1.79       |
| 313.15          | 6.093   | 0.20                             | 2.95                 | 3.54         | 3.12       |
| 100 $RAD$       |         | 0.38                             | 1.44                 | 1.49         | 1.27       |
| <i>ethanol</i>  |         |                                  |                      |              |            |
| 278.15          | 3.181   | 1.25                             | 3.88                 | 3.77         | 0.92       |
| 280.65          | 3.311   | -0.95                            | 0.60                 | 0.44         | -1.12      |
| 283.15          | 3.553   | -0.18                            | 0.40                 | 0.21         | -0.22      |
| 285.65          | 3.771   | -0.61                            | -0.78                | -1.00        | -0.55      |
| 288.15          | 4.057   | 0.24                             | -0.51                | -0.73        | 0.37       |
| 290.65          | 4.327   | 0.14                             | -1.01                | -1.22        | 0.31       |
| 293.15          | 4.621   | 0.10                             | -1.29                | -1.47        | 0.29       |
| 295.65          | 4.928   | -0.15                            | -1.62                | -1.76        | 0.03       |
| 298.15          | 5.281   | 0.01                             | -1.36                | -1.45        | 0.17       |
| 300.65          | 5.655   | 0.04                             | -1.09                | -1.11        | 0.15       |
| 303.15          | 6.050   | -0.09                            | -0.84                | -0.77        | -0.03      |
| 305.65          | 6.508   | 0.27                             | 0.04                 | 0.21         | 0.26       |
| 308.15          | 6.967   | 0.09                             | 0.51                 | 0.79         | -0.00      |

|                    |       |       |       |       |       |
|--------------------|-------|-------|-------|-------|-------|
| 310.65             | 7.457 | -0.16 | 1.03  | 1.44  | -0.34 |
| 313.15             | 8.017 | -0.02 | 2.05  | 2.60  | -0.28 |
| 100 RAD            |       | 0.29  | 1.13  | 1.26  | 0.34  |
| <i>n-propanol</i>  |       |       |       |       |       |
| 278.15             | 2.972 | -0.40 | 1.31  | 1.39  | -0.17 |
| 280.65             | 3.185 | 0.10  | 1.06  | 1.06  | 0.18  |
| 283.15             | 3.397 | 0.09  | 0.45  | 0.38  | 0.07  |
| 285.65             | 3.622 | 0.03  | -0.10 | -0.22 | -0.05 |
| 288.15             | 3.871 | 0.18  | -0.32 | -0.47 | 0.07  |
| 290.65             | 4.124 | -0.02 | -0.77 | -0.94 | -0.12 |
| 293.15             | 4.402 | -0.04 | -0.93 | -1.10 | -0.12 |
| 295.65             | 4.721 | 0.39  | -0.53 | -0.69 | 0.35  |
| 298.15             | 5.018 | -0.09 | -0.95 | -1.08 | -0.09 |
| 300.65             | 5.352 | -0.24 | -0.95 | -1.03 | -0.20 |
| 303.15             | 5.731 | 0.00  | -0.47 | -0.48 | 0.06  |
| 305.65             | 6.119 | -0.08 | -0.21 | -0.14 | -0.01 |
| 308.15             | 6.553 | 0.13  | 0.42  | 0.59  | 0.19  |
| 310.65             | 6.976 | -0.26 | 0.51  | 0.80  | -0.26 |
| 313.15             | 7.490 | 0.19  | 1.52  | 1.94  | 0.10  |
| 100 RAD            |       | 0.15  | 0.70  | 0.82  | 0.14  |
| <i>isopropanol</i> |       |       |       |       |       |
| 278.15             | 2.476 | 0.40  | 2.51  | 2.51  | 0.42  |
| 280.65             | 2.613 | -0.68 | 0.53  | 0.46  | -0.69 |
| 283.15             | 2.813 | 0.17  | 0.62  | 0.50  | 0.15  |
| 285.65             | 3.006 | 0.23  | 0.07  | -0.08 | 0.20  |
| 288.15             | 3.199 | -0.18 | -0.80 | -0.97 | -0.20 |
| 290.65             | 3.415 | -0.32 | -1.26 | -1.44 | -0.33 |
| 293.15             | 3.672 | 0.21  | -0.90 | -1.07 | 0.22  |
| 295.65             | 3.920 | -0.02 | -1.18 | -1.33 | 0.01  |
| 298.15             | 4.208 | 0.27  | -0.82 | -0.92 | 0.31  |
| 300.65             | 4.508 | 0.31  | -0.58 | -0.63 | 0.36  |
| 303.15             | 4.806 | -0.17 | -0.75 | -0.73 | -0.12 |
| 305.65             | 5.147 | -0.23 | -0.39 | -0.28 | -0.19 |
| 308.15             | 5.530 | 0.01  | 0.36  | 0.57  | 0.01  |
| 310.65             | 5.919 | -0.17 | 0.79  | 1.12  | -0.22 |
| 313.15             | 6.370 | 0.17  | 1.82  | 2.29  | 0.05  |
| 100 RAD            |       | 0.24  | 0.89  | 0.99  | 0.23  |
| <i>2-butanone</i>  |       |       |       |       |       |

|                      |        |       |       |       |        |
|----------------------|--------|-------|-------|-------|--------|
| 278.15               | 1.574  | -0.46 | 1.68  | 1.66  | -0.13  |
| 280.65               | 1.694  | -0.02 | 1.19  | 1.12  | 0.09   |
| 283.15               | 1.814  | -0.14 | 0.31  | 0.20  | -0.18  |
| 285.65               | 1.954  | 0.28  | 0.12  | -0.02 | 0.16   |
| 288.15               | 2.105  | 0.66  | 0.05  | -0.11 | 0.50   |
| 290.65               | 2.245  | -0.00 | -0.94 | -1.1  | -0.16  |
| 293.15               | 2.408  | -0.14 | -1.26 | -1.41 | -0.26  |
| 295.65               | 2.590  | -0.04 | -1.20 | -1.33 | -0.10  |
| 298.15               | 2.785  | -0.00 | -1.08 | -1.18 | -0.003 |
| 300.65               | 2.988  | -0.22 | -1.11 | -1.15 | -0.16  |
| 303.15               | 3.225  | 0.12  | -0.45 | -0.43 | 0.23   |
| 305.65               | 3.467  | 0.04  | -0.12 | -0.02 | 0.17   |
| 308.15               | 3.720  | -0.26 | 0.09  | 0.29  | -0.16  |
| 310.65               | 4.018  | 0.07  | 1.03  | 1.33  | 0.08   |
| 313.15               | 4.327  | 0.08  | 1.73  | 2.15  | -0.07  |
| 100 RAD              |        | 0.17  | 0.82  | 0.90  | 0.16   |
| <i>acetone</i>       |        |       |       |       |        |
| 278.15               | 1.389  | 0.26  | 2.05  | 2.05  | 0.28   |
| 280.65               | 1.486  | -0.11 | 0.91  | 0.86  | -0.11  |
| 283.15               | 1.596  | -0.11 | 0.26  | 0.16  | -0.12  |
| 285.65               | 1.712  | -0.27 | -0.41 | -0.54 | -0.29  |
| 288.15               | 1.842  | -0.14 | -0.68 | -0.82 | -0.16  |
| 290.65               | 1.983  | 0.01  | -0.79 | -0.94 | 0.001  |
| 293.15               | 2.138  | 0.30  | -0.65 | -0.79 | 0.30   |
| 295.65               | 2.294  | 0.08  | -0.90 | -1.03 | 0.09   |
| 298.15               | 2.464  | -0.05 | -0.96 | -1.05 | -0.02  |
| 300.65               | 2.659  | 0.27  | -0.47 | -0.51 | 0.31   |
| 303.15               | 2.855  | 0.08  | -0.40 | -0.39 | 0.11   |
| 305.65               | 3.060  | -0.31 | -0.44 | -0.35 | -0.28  |
| 308.15               | 3.302  | -0.04 | 0.28  | 0.45  | -0.02  |
| 310.65               | 3.549  | -0.17 | 0.66  | 0.94  | -0.19  |
| 313.15               | 3.833  | 0.18  | 1.58  | 1.97  | 0.10   |
| 100 RAD              |        | 0.16  | 0.76  | 0.86  | 0.16   |
| <i>ethyl acetate</i> |        |       |       |       |        |
| 278.15               | 0.5050 | 0.50  | 9.50  | 7.57  | -0.52  |
| 280.65               | 0.5548 | 0.89  | 6.27  | 4.59  | 0.16   |
| 283.15               | 0.6062 | 0.21  | 2.50  | 1.19  | -0.19  |
| 285.65               | 0.6763 | 1.24  | 0.94  | -0.03 | 1.09   |

|                     |          |       |       |       |       |
|---------------------|----------|-------|-------|-------|-------|
| 288.15              | 0.7449   | 0.68  | -1.65 | -2.38 | 0.68  |
| 290.65              | 0.8206   | -0.39 | -4.22 | -4.56 | -0.12 |
| 293.15              | 0.9077   | -1.23 | -6.01 | -6.16 | -0.90 |
| 295.65              | 1.009    | -2.08 | -7.24 | -7.07 | -1.58 |
| 298.15              | 1.152    | -0.53 | -5.39 | -4.96 | 0.06  |
| 300.65              | 1.298    | -0.64 | -4.75 | -4.08 | -0.02 |
| 303.15              | 1.487    | 0.59  | -2.22 | -1.35 | 1.15  |
| 305.65              | 1.686    | 0.48  | -0.61 | 0.45  | 0.89  |
| 308.15              | 1.928    | 0.94  | 1.98  | 3.19  | 1.03  |
| 310.65              | 2.194    | 0.63  | 4.19  | 5.54  | 0.19  |
| 313.15              | 2.474    | -0.86 | 5.64  | 7.11  | -2.12 |
| 100 RAD             |          | 0.79  | 4.21  | 4.02  | 0.71  |
| <i>acetonitrile</i> |          |       |       |       |       |
| 278.15              | 0.2291   | -0.17 | 1.90  | 1.76  | 0.13  |
| 280.65              | 0.2488   | -0.25 | 0.93  | 0.80  | -0.13 |
| 283.15              | 0.2707   | -0.16 | 0.28  | 0.15  | -0.17 |
| 285.65              | 0.2952   | 0.14  | -0.01 | -0.14 | 0.04  |
| 288.15              | 0.3221   | 0.46  | -0.12 | -0.24 | 0.33  |
| 290.65              | 0.3476   | -0.33 | -1.23 | -1.33 | -0.46 |
| 293.15              | 0.3805   | 0.28  | -0.78 | -0.86 | 0.18  |
| 295.65              | 0.4143   | 0.35  | -0.76 | -0.81 | 0.29  |
| 298.15              | 0.4491   | -0.05 | -1.08 | -1.10 | -0.05 |
| 300.65              | 0.4882   | -0.17 | -1.01 | -1.00 | -0.13 |
| 303.15              | 0.5309   | -0.27 | -0.82 | -0.76 | -0.18 |
| 305.65              | 0.5802   | 0.12  | -0.03 | 0.08  | 0.22  |
| 308.15              | 0.6311   | 0.03  | 0.36  | 0.53  | 0.11  |
| 310.65              | 0.6854   | -0.23 | 0.68  | 0.92  | -0.22 |
| 313.15              | 0.7493   | 0.17  | 1.72  | 2.03  | 0.04  |
| 100 RAD             |          | 0.21  | 0.78  | 0.83  | 0.18  |
| <i>toluene</i>      |          |       |       |       |       |
| 278.15              | 0.001105 | 3.04  | 2.98  | 2.44  | 0.99  |
| 280.65              | 0.001203 | -3.19 | -3.36 | -3.76 | -4.64 |
| 283.15              | 0.001496 | 4.07  | 3.85  | 3.62  | 3.32  |
| 285.65              | 0.001605 | -3.14 | -3.42 | -3.54 | -3.39 |
| 288.15              | 0.001985 | 4.01  | 3.73  | 3.72  | 4.21  |
| 290.65              | 0.002167 | -1.00 | -1.29 | -1.21 | -0.43 |
| 293.15              | 0.002487 | -0.87 | -1.14 | -1.00 | -0.05 |
| 295.65              | 0.002849 | -0.74 | -0.96 | -0.78 | 0.24  |

|                        |          |       |       |       |       |
|------------------------|----------|-------|-------|-------|-------|
| 298.15                 | 0.003256 | -0.64 | -0.81 | -0.61 | 0.38  |
| 300.65                 | 0.003615 | -3.30 | -3.41 | -3.19 | -2.33 |
| 303.15                 | 0.004282 | 0.80  | 0.77  | 0.97  | 1.53  |
| 305.65                 | 0.004871 | 0.98  | 1.04  | 1.20  | 1.36  |
| 308.15                 | 0.005561 | 1.70  | 1.84  | 1.95  | 1.57  |
| 310.65                 | 0.006199 | 0.22  | 0.46  | 0.50  | -0.60 |
| 313.15                 | 0.006923 | -0.92 | -0.59 | -0.63 | -2.66 |
| 100 RAD                |          | 1.91  | 1.98  | 1.94  | 1.85  |
| <i>1,4-dioxane</i>     |          |       |       |       |       |
| 288.15                 | 1.452    | 0.12  | 2.99  | 2.60  | -0.11 |
| 290.65                 | 1.582    | 0.46  | 1.66  | 1.35  | 0.33  |
| 293.15                 | 1.713    | -0.07 | -0.15 | -0.38 | -0.09 |
| 295.65                 | 1.869    | -0.07 | -1.07 | -1.22 | -0.01 |
| 298.15                 | 2.024    | -1.05 | -2.62 | -2.68 | -0.91 |
| 300.65                 | 2.245    | 0.16  | -1.57 | -1.56 | 0.34  |
| 303.15                 | 2.466    | 0.19  | -1.38 | -1.30 | 0.38  |
| 305.65                 | 2.721    | 0.46  | -0.60 | -0.45 | 0.62  |
| 308.15                 | 2.976    | -0.33 | -0.59 | -0.36 | -0.27 |
| 310.65                 | 3.309    | 0.33  | 1.20  | 1.49  | 0.24  |
| 313.15                 | 3.642    | -0.20 | 2.08  | 2.43  | -0.54 |
| 100 RAD                |          | 0.31  | 1.45  | 1.44  | 0.35  |
| <i>isoamyl alcohol</i> |          |       |       |       |       |
| 278.15                 | 1.092    | -0.17 | -1.34 | -0.12 | -0.13 |
| 280.65                 | 1.135    | -0.05 | -0.66 | -0.05 | -0.06 |
| 283.15                 | 1.182    | 0.23  | 0.11  | 0.20  | 0.20  |
| 285.65                 | 1.228    | 0.25  | 0.55  | 0.21  | 0.21  |
| 288.15                 | 1.275    | 0.19  | 0.81  | 0.15  | 0.15  |
| 290.65                 | 1.321    | -0.11 | 0.76  | -0.14 | -0.14 |
| 293.15                 | 1.370    | -0.34 | 0.68  | -0.35 | -0.34 |
| 295.65                 | 1.426    | -0.22 | 0.84  | -0.20 | -0.20 |
| 298.15                 | 1.483    | -0.20 | 0.78  | -0.17 | -0.16 |
| 300.65                 | 1.549    | 0.23  | 1.00  | 0.28  | 0.29  |
| 303.15                 | 1.609    | 0.10  | 0.51  | 0.15  | 0.16  |
| 305.65                 | 1.673    | 0.05  | -0.05 | 0.09  | 0.10  |
| 308.15                 | 1.743    | 0.18  | -0.60 | 0.20  | 0.20  |
| 310.65                 | 1.810    | -0.03 | -1.69 | -0.05 | -0.06 |
| 313.15                 | 1.882    | -0.12 | -2.90 | -0.21 | -0.24 |
| 100 RAD                |          | 0.16  | 0.89  | 0.17  | 0.18  |

---

|                         |       |       |       |       |        |
|-------------------------|-------|-------|-------|-------|--------|
| <i>n-hexanol</i>        |       |       |       |       |        |
| 278.15                  | 1.139 | 0.30  | -0.84 | 1.27  | 0.18   |
| 280.65                  | 1.182 | -0.10 | -0.73 | 0.41  | -0.19  |
| 283.15                  | 1.234 | 0.07  | -0.11 | 0.20  | 0.01   |
| 285.65                  | 1.289 | 0.27  | 0.48  | 0.10  | 0.25   |
| 288.15                  | 1.340 | -0.05 | 0.48  | -0.44 | -0.03  |
| 290.65                  | 1.394 | -0.32 | 0.45  | -0.85 | -0.27  |
| 293.15                  | 1.452 | -0.49 | 0.43  | -1.09 | -0.41  |
| 295.65                  | 1.519 | -0.25 | 0.72  | -0.85 | -0.15  |
| 298.15                  | 1.589 | -0.04 | 0.88  | -0.57 | 0.07   |
| 300.65                  | 1.660 | 0.01  | 0.76  | -0.39 | 0.13   |
| 303.15                  | 1.738 | 0.26  | 0.71  | 0.04  | 0.36   |
| 305.65                  | 1.818 | 0.40  | 0.41  | 0.41  | 0.46   |
| 308.15                  | 1.898 | 0.33  | -0.28 | 0.62  | 0.33   |
| 310.65                  | 1.976 | -0.03 | -1.45 | 0.58  | -0.14  |
| 313.15                  | 2.058 | -0.38 | -2.82 | 0.60  | -0.61  |
| 100 RAD                 |       | 0.22  | 0.77  | 0.56  | 0.24   |
| <i>n-heptanol</i>       |       |       |       |       |        |
| 278.15                  | 1.188 | -0.32 | -0.58 | 1.69  | -0.08  |
| 280.65                  | 1.235 | -0.20 | -0.40 | 0.87  | -0.14  |
| 283.15                  | 1.290 | 0.29  | 0.17  | 0.59  | 0.23   |
| 285.65                  | 1.342 | 0.26  | 0.25  | -0.05 | 0.13   |
| 288.15                  | 1.396 | 0.12  | 0.22  | -0.64 | -0.03  |
| 290.65                  | 1.457 | 0.21  | 0.42  | -0.85 | 0.08   |
| 293.15                  | 1.519 | 0.10  | 0.40  | -1.12 | 0.01   |
| 295.65                  | 1.584 | -0.09 | 0.28  | -1.33 | -0.12  |
| 298.15                  | 1.653 | -0.29 | 0.11  | -1.41 | -0.25  |
| 300.65                  | 1.731 | -0.23 | 0.15  | -1.10 | -0.13  |
| 303.15                  | 1.818 | 0.04  | 0.32  | -0.46 | 0.19   |
| 305.65                  | 1.901 | -0.20 | -0.10 | -0.23 | -0.05  |
| 308.15                  | 2.005 | 0.33  | 0.15  | 0.88  | 0.44   |
| 310.65                  | 2.098 | 0.01  | -0.58 | 1.24  | -0.001 |
| 313.15                  | 2.203 | -0.04 | -1.19 | 1.96  | -0.26  |
| 100 RAD                 |       | 0.18  | 0.36  | 0.96  | 0.14   |
| <i>isooctyl alcohol</i> |       |       |       |       |        |
| 278.15                  | 1.080 | -0.05 | -0.47 | 1.72  | -0.04  |
| 280.65                  | 1.115 | 0.02  | -0.26 | 0.96  | -0.002 |
| 283.15                  | 1.153 | 0.14  | 0.01  | 0.39  | 0.11   |

---

|             |       |       |       |       |       |
|-------------|-------|-------|-------|-------|-------|
| 285.65      | 1.193 | 0.21  | 0.24  | -0.07 | 0.18  |
| 288.15      | 1.232 | -0.01 | 0.17  | -0.69 | -0.04 |
| 290.65      | 1.275 | -0.11 | 0.20  | -1.06 | -0.13 |
| 293.15      | 1.319 | -0.35 | 0.07  | -1.44 | -0.34 |
| 295.65      | 1.372 | -0.13 | 0.36  | -1.22 | -0.1  |
| 298.15      | 1.428 | 0.07  | 0.57  | -0.92 | 0.11  |
| 300.65      | 1.485 | 0.09  | 0.54  | -0.67 | 0.15  |
| 303.15      | 1.543 | -0.04 | 0.27  | -0.48 | 0.02  |
| 305.65      | 1.610 | 0.16  | 0.24  | 0.15  | 0.22  |
| 308.15      | 1.677 | 0.12  | -0.15 | 0.62  | 0.14  |
| 310.65      | 1.748 | 0.08  | -0.68 | 1.18  | 0.04  |
| 313.15      | 1.819 | -0.19 | -1.61 | 1.58  | -0.32 |
| 100 RAD     |       | 0.12  | 0.39  | 0.88  | 0.13  |
| <i>DMF</i>  |       |       |       |       |       |
| 278.15      | 4.124 | -0.72 | 0.13  | 1.42  | 0.81  |
| 280.65      | 4.644 | -0.04 | 0.41  | 1.17  | 1.07  |
| 283.15      | 5.220 | 0.57  | 0.71  | 0.99  | 1.24  |
| 285.65      | 5.865 | 1.25  | 1.14  | 1.02  | 1.47  |
| 288.15      | 6.456 | 0.004 | -0.29 | -0.74 | -0.22 |
| 290.65      | 7.199 | 0.16  | -0.26 | -0.95 | -0.47 |
| 293.15      | 7.942 | -0.65 | -1.13 | -2.00 | -1.63 |
| 295.65      | 8.843 | -0.43 | -0.91 | -1.85 | -1.65 |
| 298.15      | 9.800 | -0.58 | -1.01 | -1.92 | -1.91 |
| 300.65      | 10.90 | -0.21 | -0.55 | -1.36 | -1.52 |
| 303.15      | 12.13 | 0.24  | 0.03  | -0.49 | -0.78 |
| 305.65      | 13.43 | 0.30  | 0.27  | 0.11  | -0.23 |
| 308.15      | 14.85 | 0.34  | 0.53  | 0.83  | 0.55  |
| 310.65      | 16.37 | 0.12  | 0.56  | 1.51  | 1.38  |
| 313.15      | 17.98 | -0.29 | 0.42  | 2.07  | 2.24  |
| 100 RAD     |       | 0.39  | 0.56  | 1.23  | 1.14  |
| <i>DMSO</i> |       |       |       |       |       |
| 278.15      | 3.369 | 0.26  | 1.74  | 2.91  | 0.59  |
| 280.65      | 3.770 | 0.04  | 0.85  | 1.53  | 0.43  |
| 283.15      | 4.213 | -0.25 | 0.003 | 0.24  | 0.13  |
| 285.65      | 4.746 | 0.33  | 0.15  | 0.01  | 0.62  |
| 288.15      | 5.287 | -0.13 | -0.64 | -1.1  | 0.01  |
| 290.65      | 5.918 | -0.05 | -0.77 | -1.47 | -0.09 |
| 293.15      | 6.639 | 0.33  | -0.50 | -1.35 | 0.08  |



|         |       |       |       |       |       |
|---------|-------|-------|-------|-------|-------|
| 295.65  | 7.377 | -0.18 | -1.03 | -1.96 | -0.64 |
| 298.15  | 8.205 | -0.53 | -1.31 | -2.21 | -1.16 |
| 300.65  | 9.205 | 0.05  | -0.56 | -1.32 | -0.66 |
| 303.15  | 10.26 | 0.07  | -0.30 | -0.84 | -0.64 |
| 305.65  | 11.43 | 0.02  | -0.03 | -0.16 | -0.45 |
| 308.15  | 12.75 | 0.23  | 0.56  | 0.90  | 0.14  |
| 310.65  | 14.16 | 0.07  | 0.83  | 1.77  | 0.59  |
| 313.15  | 15.71 | -0.14 | 1.12  | 2.79  | 1.29  |
| 100 RAD |       | 0.17  | 0.69  | 1.37  | 0.50  |

<sup>a</sup>Standard uncertainties  $u$  are  $u(T) = 0.02$  K,  $u(p) = 0.45$  kPa; Relative standard uncertainty  $u_r$  is  $u_r(x) = 0.027$ .

**Table S6** The Calculated Values for  $\Delta_{\text{mix}}G$ ,  $\Delta_{\text{mix}}H$ ,  $\Delta_{\text{mix}}S$ ,  $\ln \gamma_1^\infty$ , and  $H_1^{E,\infty}$ :  $\Delta_{\text{mix}}G$ ,  $\Delta_{\text{mix}}H$  and  $\Delta_{\text{mix}}S$  Denote the Mixing Gibbs Free Energy, Mixing Enthalpy, and Mixing Entropy, Respectively;  $\gamma_1^\infty$  Denotes the Activity Coefficient at Infinitesimal Concentration, and  $H_1^{E,\infty}$  Denotes Reduced Excess Enthalpy.

| $T/\text{K}$    | $\Delta_{\text{mix}}G$<br>J·mol <sup>-1</sup> | $\Delta_{\text{mix}}H$<br>J·mol <sup>-1</sup> | $\Delta_{\text{mix}}S$<br>J·K <sup>-1</sup> ·mol <sup>-1</sup> | $\ln \gamma_1^\infty$ | $H_1^{E,\infty}$<br>kJ·mol <sup>-1</sup> |
|-----------------|-----------------------------------------------|-----------------------------------------------|----------------------------------------------------------------|-----------------------|------------------------------------------|
| <i>Methanol</i> |                                               |                                               |                                                                |                       |                                          |
| 278.15          | -203.4                                        | -0.67                                         | 0.729                                                          | 0.860                 |                                          |
| 280.65          | -215.7                                        | -0.72                                         | 0.766                                                          | 0.860                 |                                          |
| 283.15          | -227.9                                        | -0.76                                         | 0.802                                                          | 0.860                 |                                          |
| 285.65          | -242.9                                        | -0.82                                         | 0.847                                                          | 0.860                 |                                          |
| 288.15          | -257.7                                        | -0.88                                         | 0.891                                                          | 0.860                 |                                          |
| 290.65          | -272.8                                        | -0.94                                         | 0.935                                                          | 0.860                 |                                          |
| 293.15          | -289.1                                        | -1.00                                         | 0.983                                                          | 0.860                 |                                          |
| 295.65          | -304.9                                        | -1.07                                         | 1.028                                                          | 0.860                 | -0.030                                   |
| 298.15          | -324.3                                        | -1.15                                         | 1.084                                                          | 0.861                 |                                          |
| 300.65          | -344.1                                        | -1.23                                         | 1.140                                                          | 0.861                 |                                          |
| 303.15          | -363.7                                        | -1.31                                         | 1.196                                                          | 0.861                 |                                          |
| 305.65          | -386.5                                        | -1.41                                         | 1.260                                                          | 0.861                 |                                          |
| 308.15          | -412.5                                        | -1.53                                         | 1.334                                                          | 0.861                 |                                          |
| 310.65          | -437.1                                        | -1.64                                         | 1.402                                                          | 0.861                 |                                          |
| 313.15          | -464.6                                        | -1.77                                         | 1.478                                                          | 0.861                 |                                          |
| <i>Ethanol</i>  |                                               |                                               |                                                                |                       |                                          |
| 278.15          | -289.0                                        | -31.49                                        | 0.926                                                          | 0.507                 |                                          |
| 280.65          | -300.0                                        | -32.74                                        | 0.952                                                          | 0.511                 |                                          |
| 283.15          | -318.5                                        | -35.08                                        | 1.001                                                          | 0.515                 |                                          |
| 285.65          | -335.3                                        | -37.17                                        | 1.044                                                          | 0.519                 |                                          |
| 288.15          | -356.4                                        | -39.92                                        | 1.098                                                          | 0.523                 |                                          |
| 290.65          | -376.2                                        | -42.49                                        | 1.148                                                          | 0.526                 |                                          |
| 293.15          | -397.3                                        | -45.29                                        | 1.201                                                          | 0.530                 | -1.01                                    |
| 295.65          | -418.9                                        | -48.19                                        | 1.254                                                          | 0.533                 |                                          |
| 298.15          | -443.1                                        | -51.51                                        | 1.313                                                          | 0.537                 |                                          |
| 300.65          | -468.1                                        | -55.01                                        | 1.374                                                          | 0.540                 |                                          |
| 303.15          | -493.9                                        | -58.69                                        | 1.436                                                          | 0.543                 |                                          |
| 305.65          | -522.8                                        | -62.93                                        | 1.505                                                          | 0.547                 |                                          |

|                    |        |        |       |       |        |
|--------------------|--------|--------|-------|-------|--------|
| 308.15             | -551.3 | -67.14 | 1.571 | 0.550 |        |
| 310.65             | -580.8 | -71.60 | 1.639 | 0.553 |        |
| 313.15             | -613.3 | -76.66 | 1.714 | 0.556 |        |
| <i>n-Propanol</i>  |        |        |       |       |        |
| 278.15             | -271.7 | -42.30 | 0.825 | 0.552 |        |
| 280.65             | -288.1 | -45.26 | 0.865 | 0.558 |        |
| 283.15             | -304.4 | -48.20 | 0.905 | 0.563 |        |
| 285.65             | -321.4 | -51.31 | 0.946 | 0.569 |        |
| 288.15             | -339.8 | -54.73 | 0.989 | 0.574 |        |
| 290.65             | -358.2 | -58.20 | 1.032 | 0.579 |        |
| 293.15             | -378.0 | -61.99 | 1.078 | 0.584 |        |
| 295.65             | -400.1 | -66.33 | 1.129 | 0.589 | -1.45  |
| 298.15             | -420.5 | -70.34 | 1.175 | 0.594 |        |
| 300.65             | -442.9 | -74.83 | 1.224 | 0.599 |        |
| 303.15             | -467.5 | -79.89 | 1.278 | 0.604 |        |
| 305.65             | -492.1 | -85.04 | 1.332 | 0.609 |        |
| 308.15             | -518.9 | -90.77 | 1.389 | 0.613 |        |
| 310.65             | -544.5 | -96.30 | 1.443 | 0.618 |        |
| 313.15             | -574.3 | -103.0 | 1.505 | 0.622 |        |
| <i>Isopropanol</i> |        |        |       |       |        |
| 278.15             | -225.7 | -24.32 | 0.724 | 0.752 |        |
| 280.65             | -236.8 | -25.64 | 0.752 | 0.755 |        |
| 283.15             | -252.0 | -27.55 | 0.793 | 0.759 |        |
| 285.65             | -266.7 | -29.39 | 0.831 | 0.763 |        |
| 288.15             | -281.2 | -31.23 | 0.867 | 0.767 |        |
| 290.65             | -297.1 | -33.27 | 0.908 | 0.770 |        |
| 293.15             | -315.3 | -35.70 | 0.954 | 0.774 |        |
| 295.65             | -332.8 | -38.02 | 0.997 | 0.777 | -1.00  |
| 298.15             | -352.5 | -40.71 | 1.046 | 0.781 |        |
| 300.65             | -372.6 | -43.50 | 1.095 | 0.784 |        |
| 303.15             | -392.3 | -46.25 | 1.142 | 0.787 |        |
| 305.65             | -414.1 | -49.38 | 1.193 | 0.791 |        |
| 308.15             | -437.9 | -52.88 | 1.249 | 0.794 |        |
| 310.65             | -461.5 | -56.39 | 1.304 | 0.797 |        |
| 313.15             | -487.9 | -60.44 | 1.365 | 0.800 |        |
| <i>2-Butanone</i>  |        |        |       |       |        |
| 278.15             | -143.8 | -0.49  | 0.515 | 1.205 | -0.032 |

|                      |        |       |       |       |       |
|----------------------|--------|-------|-------|-------|-------|
| 280.65               | -153.2 | -0.53 | 0.544 | 1.205 |       |
| 283.15               | -162.6 | -0.57 | 0.572 | 1.205 |       |
| 285.65               | -173.3 | -0.61 | 0.605 | 1.205 |       |
| 288.15               | -184.6 | -0.66 | 0.638 | 1.205 |       |
| 290.65               | -195.1 | -0.70 | 0.669 | 1.205 |       |
| 293.15               | -207.0 | -0.75 | 0.703 | 1.206 |       |
| 295.65               | -219.9 | -0.80 | 0.741 | 1.206 |       |
| 298.15               | -233.4 | -0.86 | 0.780 | 1.206 |       |
| 300.65               | -247.3 | -0.92 | 0.820 | 1.206 |       |
| 303.15               | -263.0 | -0.99 | 0.864 | 1.206 |       |
| 305.65               | -278.7 | -1.06 | 0.908 | 1.206 |       |
| 308.15               | -294.8 | -1.14 | 0.953 | 1.206 |       |
| 310.65               | -313.1 | -1.22 | 1.004 | 1.206 |       |
| 313.15               | -331.6 | -1.31 | 1.055 | 1.206 |       |
| <i>Acetone</i>       |        |       |       |       |       |
| 278.15               | -126.8 | 1.41  | 0.461 | 1.336 |       |
| 280.65               | -134.5 | 1.50  | 0.485 | 1.335 |       |
| 283.15               | -143.1 | 1.61  | 0.511 | 1.335 |       |
| 285.65               | -152.0 | 1.73  | 0.538 | 1.335 |       |
| 288.15               | -161.8 | 1.85  | 0.568 | 1.334 |       |
| 290.65               | -172.2 | 1.99  | 0.599 | 1.334 |       |
| 293.15               | -183.4 | 2.14  | 0.633 | 1.333 |       |
| 295.65               | -194.6 | 2.29  | 0.666 | 1.333 | 0.103 |
| 298.15               | -206.5 | 2.46  | 0.701 | 1.333 |       |
| 300.65               | -219.7 | 2.64  | 0.739 | 1.332 |       |
| 303.15               | -232.8 | 2.83  | 0.777 | 1.332 |       |
| 305.65               | -246.3 | 3.03  | 0.816 | 1.332 |       |
| 308.15               | -261.6 | 3.25  | 0.859 | 1.331 |       |
| 310.65               | -276.9 | 3.48  | 0.903 | 1.331 |       |
| 313.15               | -294.0 | 3.75  | 0.951 | 1.331 |       |
| <i>Ethyl acetate</i> |        |       |       |       |       |
| 278.15               | -45.42 | 59.06 | 0.376 | 2.415 |       |
| 280.65               | -49.73 | 64.82 | 0.408 | 2.369 |       |
| 283.15               | -54.21 | 70.75 | 0.441 | 2.323 | 11.94 |
| 285.65               | -59.98 | 78.82 | 0.486 | 2.279 |       |
| 288.15               | -65.71 | 86.70 | 0.529 | 2.235 |       |
| 290.65               | -71.96 | 95.37 | 0.576 | 2.192 |       |

|        |        |       |       |       |
|--------|--------|-------|-------|-------|
| 293.15 | -79.00 | 105.3 | 0.629 | 2.15  |
| 295.65 | -86.99 | 116.9 | 0.689 | 2.109 |
| 298.15 | -97.58 | 133.0 | 0.773 | 2.068 |
| 300.65 | -108.3 | 149.5 | 0.858 | 2.028 |
| 303.15 | -121.6 | 170.6 | 0.964 | 1.989 |
| 305.65 | -135.4 | 192.8 | 1.073 | 1.950 |
| 308.15 | -151.4 | 219.5 | 1.203 | 1.912 |
| 310.65 | -168.6 | 248.6 | 1.343 | 1.874 |
| 313.15 | -186.4 | 279.0 | 1.486 | 1.838 |

*Acetonitrile*

|        |        |       |       |       |
|--------|--------|-------|-------|-------|
| 278.15 | -20.92 | 7.06  | 0.101 | 3.146 |
| 280.65 | -22.53 | 7.66  | 0.108 | 3.134 |
| 283.15 | -24.27 | 8.32  | 0.115 | 3.122 |
| 285.65 | -26.19 | 9.05  | 0.123 | 3.111 |
| 288.15 | -28.25 | 9.86  | 0.132 | 3.099 |
| 290.65 | -30.22 | 10.62 | 0.141 | 3.088 |
| 293.15 | -32.65 | 11.60 | 0.151 | 3.077 |
| 295.65 | -35.12 | 12.60 | 0.161 | 3.066 |
| 298.15 | -37.63 | 13.63 | 0.172 | 3.055 |
| 300.65 | -40.39 | 14.78 | 0.183 | 3.045 |
| 303.15 | -43.34 | 16.03 | 0.196 | 3.034 |
| 305.65 | -46.63 | 17.46 | 0.210 | 3.024 |
| 308.15 | -49.98 | 18.93 | 0.224 | 3.014 |
| 310.65 | -53.49 | 20.48 | 0.238 | 3.004 |
| 313.15 | -57.47 | 22.30 | 0.255 | 2.995 |

3.14

*Toluene*

|        |       |      |       |       |
|--------|-------|------|-------|-------|
| 278.15 | -0.10 | 0.19 | 0.001 | 8.490 |
| 280.65 | -0.11 | 0.20 | 0.001 | 8.424 |
| 283.15 | -0.13 | 0.25 | 0.001 | 8.359 |
| 285.65 | -0.14 | 0.27 | 0.001 | 8.295 |
| 288.15 | -0.17 | 0.33 | 0.002 | 8.232 |
| 290.65 | -0.19 | 0.36 | 0.002 | 8.170 |
| 293.15 | -0.21 | 0.41 | 0.002 | 8.110 |
| 295.65 | -0.24 | 0.47 | 0.002 | 8.05  |
| 298.15 | -0.27 | 0.54 | 0.003 | 7.991 |
| 300.65 | -0.30 | 0.60 | 0.003 | 7.934 |
| 303.15 | -0.35 | 0.71 | 0.003 | 7.877 |
| 305.65 | -0.39 | 0.80 | 0.004 | 7.821 |

17.18

|                        |        |        |        |       |        |
|------------------------|--------|--------|--------|-------|--------|
| 308.15                 | -0.44  | 0.91   | 0.004  | 7.766 |        |
| 310.65                 | -0.48  | 1.01   | 0.005  | 7.713 |        |
| 313.15                 | -0.54  | 1.13   | 0.005  | 7.659 |        |
| <i>1,4-Dioxane</i>     |        |        |        |       |        |
| 288.15                 | -126.4 | 94.40  | 0.766  | 1.611 |        |
| 290.65                 | -136.5 | 102.6  | 0.823  | 1.587 |        |
| 293.15                 | -146.8 | 111.0  | 0.879  | 1.564 |        |
| 295.65                 | -158.6 | 120.8  | 0.945  | 1.540 |        |
| 298.15                 | -170.4 | 130.6  | 1.009  | 1.518 |        |
| 300.65                 | -186.0 | 144.4  | 1.099  | 1.495 | 6.68   |
| 303.15                 | -201.6 | 158.2  | 1.187  | 1.473 |        |
| 305.65                 | -219.0 | 174.0  | 1.286  | 1.452 |        |
| 308.15                 | -236.4 | 189.7  | 1.383  | 1.430 |        |
| 310.65                 | -257.7 | 210.1  | 1.506  | 1.409 |        |
| 313.15                 | -278.9 | 230.3  | 1.626  | 1.389 |        |
| <i>Isoamyl alcohol</i> |        |        |        |       |        |
| 278.15                 | -99.61 | -125.0 | -0.091 | 1.609 |        |
| 280.65                 | -102.3 | -128.8 | -0.095 | 1.655 |        |
| 283.15                 | -105.2 | -133.0 | -0.098 | 1.699 |        |
| 285.65                 | -107.9 | -137.0 | -0.102 | 1.743 |        |
| 288.15                 | -110.7 | -141.0 | -0.105 | 1.785 |        |
| 290.65                 | -113.4 | -144.8 | -0.108 | 1.827 |        |
| 293.15                 | -116.2 | -148.9 | -0.112 | 1.867 |        |
| 295.65                 | -119.3 | -153.7 | -0.116 | 1.907 | -11.43 |
| 298.15                 | -122.4 | -158.4 | -0.121 | 1.946 |        |
| 300.65                 | -126.0 | -163.9 | -0.126 | 1.984 |        |
| 303.15                 | -129.1 | -168.8 | -0.131 | 2.021 |        |
| 305.65                 | -132.4 | -173.9 | -0.136 | 2.057 |        |
| 308.15                 | -135.9 | -179.5 | -0.142 | 2.093 |        |
| 310.65                 | -139.1 | -184.6 | -0.147 | 2.128 |        |
| 313.15                 | -142.5 | -190.2 | -0.152 | 2.162 |        |
| <i>n-hexanol</i>       |        |        |        |       |        |
| 278.15                 | -104.2 | -98.9  | 0.019  | 1.529 |        |
| 280.65                 | -107.1 | -102.5 | 0.017  | 1.563 |        |
| 283.15                 | -110.6 | -106.8 | 0.014  | 1.596 | -8.85  |
| 285.65                 | -114.3 | -111.3 | 0.010  | 1.629 |        |
| 288.15                 | -117.6 | -115.5 | 0.007  | 1.661 |        |
| 290.65                 | -121.1 | -120.0 | 0.004  | 1.693 |        |

|                         |        |        |        |       |        |
|-------------------------|--------|--------|--------|-------|--------|
| 293.15                  | -124.7 | -124.7 | -0.000 | 1.724 |        |
| 295.65                  | -128.8 | -130.2 | -0.005 | 1.755 |        |
| 298.15                  | -133.0 | -135.8 | -0.010 | 1.785 |        |
| 300.65                  | -137.1 | -141.5 | -0.015 | 1.815 |        |
| 303.15                  | -141.5 | -147.7 | -0.020 | 1.844 |        |
| 305.65                  | -146.0 | -154.1 | -0.026 | 1.873 |        |
| 308.15                  | -150.3 | -160.3 | -0.033 | 1.901 |        |
| 310.65                  | -154.4 | -166.4 | -0.039 | 1.929 |        |
| 313.15                  | -158.6 | -172.7 | -0.045 | 1.956 |        |
| <i>n-heptaol</i>        |        |        |        |       |        |
| 278.15                  | -108.5 | -99.0  | 0.034  | 1.490 |        |
| 280.65                  | -111.8 | -102.7 | 0.032  | 1.523 |        |
| 283.15                  | -115.5 | -107.2 | 0.03   | 1.555 |        |
| 285.65                  | -119.0 | -111.3 | 0.027  | 1.587 |        |
| 288.15                  | -122.6 | -115.6 | 0.024  | 1.618 |        |
| 290.65                  | -126.5 | -120.4 | 0.021  | 1.648 |        |
| 293.15                  | -130.4 | -125.2 | 0.018  | 1.678 |        |
| 295.65                  | -134.5 | -130.3 | 0.014  | 1.708 | -8.50  |
| 298.15                  | -138.6 | -135.7 | 0.010  | 1.737 |        |
| 300.65                  | -143.3 | -141.7 | 0.005  | 1.765 |        |
| 303.15                  | -148.3 | -148.4 | -0.000 | 1.793 |        |
| 305.65                  | -152.9 | -154.7 | -0.006 | 1.821 |        |
| 308.15                  | -158.6 | -162.6 | -0.013 | 1.848 |        |
| 310.65                  | -163.6 | -169.5 | -0.019 | 1.875 |        |
| 313.15                  | -169.0 | -177.3 | -0.027 | 1.901 |        |
| <i>isooctyl alcohol</i> |        |        |        |       |        |
| 278.15                  | -98.60 | -110.7 | -0.044 | 1.587 |        |
| 280.65                  | -100.9 | -114.2 | -0.047 | 1.627 |        |
| 283.15                  | -103.3 | -117.9 | -0.051 | 1.667 | -10.45 |
| 285.65                  | -105.8 | -121.8 | -0.056 | 1.706 |        |
| 288.15                  | -108.2 | -125.5 | -0.060 | 1.744 |        |
| 290.65                  | -110.8 | -129.7 | -0.065 | 1.782 |        |
| 293.15                  | -113.4 | -133.9 | -0.070 | 1.818 |        |
| 295.65                  | -116.4 | -138.9 | -0.076 | 1.855 |        |
| 298.15                  | -119.6 | -144.2 | -0.083 | 1.89  |        |
| 300.65                  | -122.7 | -149.6 | -0.089 | 1.925 |        |
| 303.15                  | -125.8 | -155.0 | -0.096 | 1.960 |        |
| 305.65                  | -129.4 | -161.2 | -0.104 | 1.994 |        |

|             |         |        |        |        |       |
|-------------|---------|--------|--------|--------|-------|
| 308.15      | -132.8  | -167.4 | -0.112 | 2.027  |       |
| 310.65      | -136.3  | -173.8 | -0.121 | 2.060  |       |
| 313.15      | -139.7  | -180.2 | -0.129 | 2.092  |       |
| <i>DMF</i>  |         |        |        |        |       |
| 278.15      | -376.9  | 487.5  | 3.108  | 0.213  |       |
| 280.65      | -420    | 548.1  | 3.45   | 0.167  |       |
| 283.15      | -467    | 615.1  | 3.822  | 0.121  |       |
| 285.65      | -518.7  | 689.8  | 4.231  | 0.076  |       |
| 288.15      | -567.1  | 758.2  | 4.6    | 0.032  |       |
| 290.65      | -625.4  | 843.9  | 5.055  | -0.011 |       |
| 293.15      | -683.9  | 929.3  | 5.503  | -0.053 |       |
| 295.65      | -752.1  | 1032.3 | 6.036  | -0.095 | 12.05 |
| 298.15      | -823.6  | 1141.4 | 6.59   | -0.136 |       |
| 300.65      | -903.1  | 1266   | 7.215  | -0.177 |       |
| 303.15      | -989.6  | 1404.6 | 7.897  | -0.217 |       |
| 305.65      | -1079.2 | 1550.2 | 8.603  | -0.256 |       |
| 308.15      | -1174.5 | 1708.2 | 9.355  | -0.294 |       |
| 310.65      | -1274.0 | 1876.1 | 10.14  | -0.332 |       |
| 313.15      | -1376.8 | 2052.7 | 10.951 | -0.369 |       |
| <i>DMSO</i> |         |        |        |        |       |
| 278.15      | -306.7  | 436.0  | 2.670  | 0.439  |       |
| 280.65      | -340.7  | 487.3  | 2.950  | 0.388  |       |
| 283.15      | -377.7  | 543.8  | 3.254  | 0.338  |       |
| 285.65      | -420.9  | 611.5  | 3.614  | 0.289  |       |
| 288.15      | -464.9  | 680.1  | 3.974  | 0.241  |       |
| 290.65      | -514.9  | 759.8  | 4.386  | 0.194  |       |
| 293.15      | -570.6  | 850.6  | 4.848  | 0.147  |       |
| 295.65      | -627.6  | 943.2  | 5.313  | 0.101  | 13.20 |
| 298.15      | -690.1  | 1046.7 | 5.825  | 0.056  |       |
| 300.65      | -762.5  | 1170.9 | 6.431  | 0.012  |       |
| 303.15      | -837.9  | 1301.3 | 7.057  | -0.032 |       |
| 305.65      | -919.4  | 1445.1 | 7.736  | -0.075 |       |
| 308.15      | -1008.3 | 1606.2 | 8.484  | -0.117 |       |
| 310.65      | -1101.1 | 1777.1 | 9.265  | -0.158 |       |
| 313.15      | -1199.9 | 1963.4 | 10.102 | -0.199 |       |

---



## ■ REFERENCES

- (1) Hammud, H. H.; Holman, K. T.; Masoud, M. S.; El-Faham, A.; Beidas, H.  
1-Hydroxybenzotriazole (HOBt) Acidity, Formation Constant with Different Metals and  
Thermodynamic Parameters: Synthesis and Characterization of Some HOBt Metal  
Complexes-crystal Structures of Two Polymers:  $[\text{Cu}_2(\text{H}_2\text{O})_5(\text{OBt})_2(\mu\text{-OBt})_2] \cdot 2\text{H}_2\text{O} \cdot \text{EtOH}$  (1A) and  
 $[\text{Cu}(\mu\text{-OBt})(\text{HOBt})(\text{OBt})(\text{EtOH})]$  (1B). *Inorg. Chim. Acta* **2009**, 362, 3526–3540.
- (2) Ferdinand, H.; Helmut, F. Non-explosive Preparations of 1-Hydroxybenzotriazole. US Patent  
5,998,628, Dec 07, 1999.
- (3) Ikawa, K. Syntheses of Acid Hydrazide Derivatives Containing a Diphenyl Ether Nucleus. IX.  
Cleavage of Diphenyl Ether Derivatives by Hydrazine. Hydrate. *Yakugaku Zasshi* **1959**, 5, 273–  
276.
- (4) Borsche, W. Exchange of OR for Other Radicals in Nitrophenol Ethers. *Ber. Dtsch. Chem. Ges.*  
**1923**, 56B, 1488–1493.
- (5) Smallwood, I. M. Handbook of Organic Solvent Properties, Arnold, London, 1996.
- (6) Yaws, C. L.; Li, K.Y. Solubility Parameter and Liquid Volume - Organic Compounds. In:  
Thermophysical Properties of Chemicals and Hydrocarbons, 2ed edition, William Andrew Inc., New  
York, 2014 (Chapter 13).
